# Supplementary material
Source: PubMed Central journal article supplement (PMC8259322)
Supplement: NIHMS1700176-supplement-1.pdf [file NIHMS1700176-supplement-1.pdf]

# Supplementary Figure S1: Other enolase peptides tested

| A | Position                 | P    | 1                 | 4  | 6 | 7 | 9 |
|---|--------------------------|------|-------------------|----|---|---|---|
|   | eno <sub>26-40</sub>     | TSKG | <u>L</u> FRAAVPSG | AS |   |   |   |
|   | cit-eno <sub>26-40</sub> | TSKG | <u>L</u> FXAAVPSG | AS |   |   |   |

| B | Position                   | P   | 1         | 4           | 6 | 7 | 9 |
|---|----------------------------|-----|-----------|-------------|---|---|---|
|   | eno <sub>241-255</sub>     | VIG | MDVAASEFF | <u>R</u> SG |   |   |   |
|   | cit-eno <sub>241-255</sub> | VIG | MDVAASEFF | <u>X</u> SG |   |   |   |

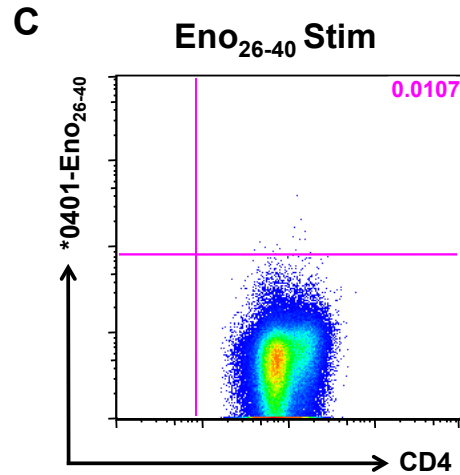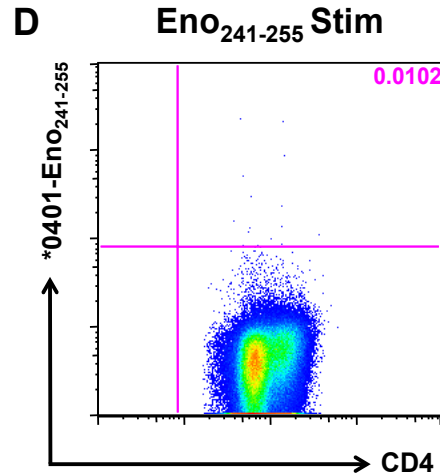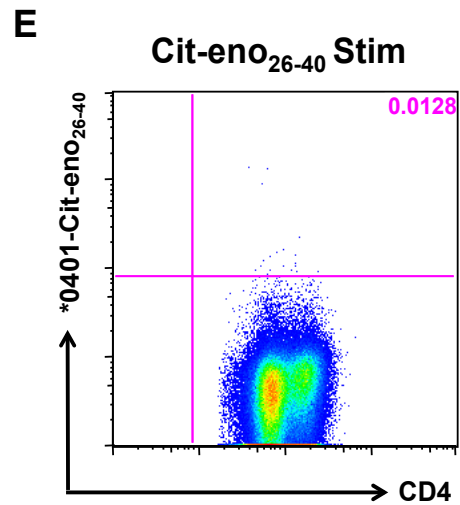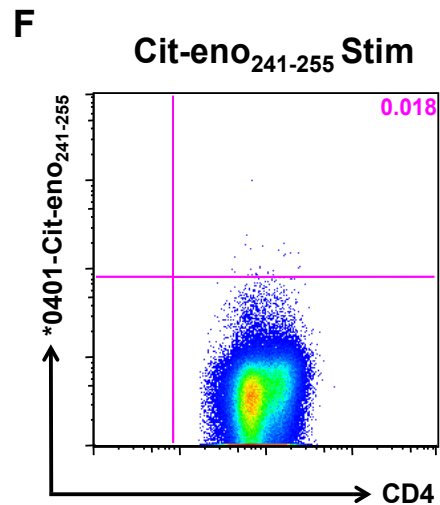

Supplementary Figure S2: Patients tested in ex vivo stainings.

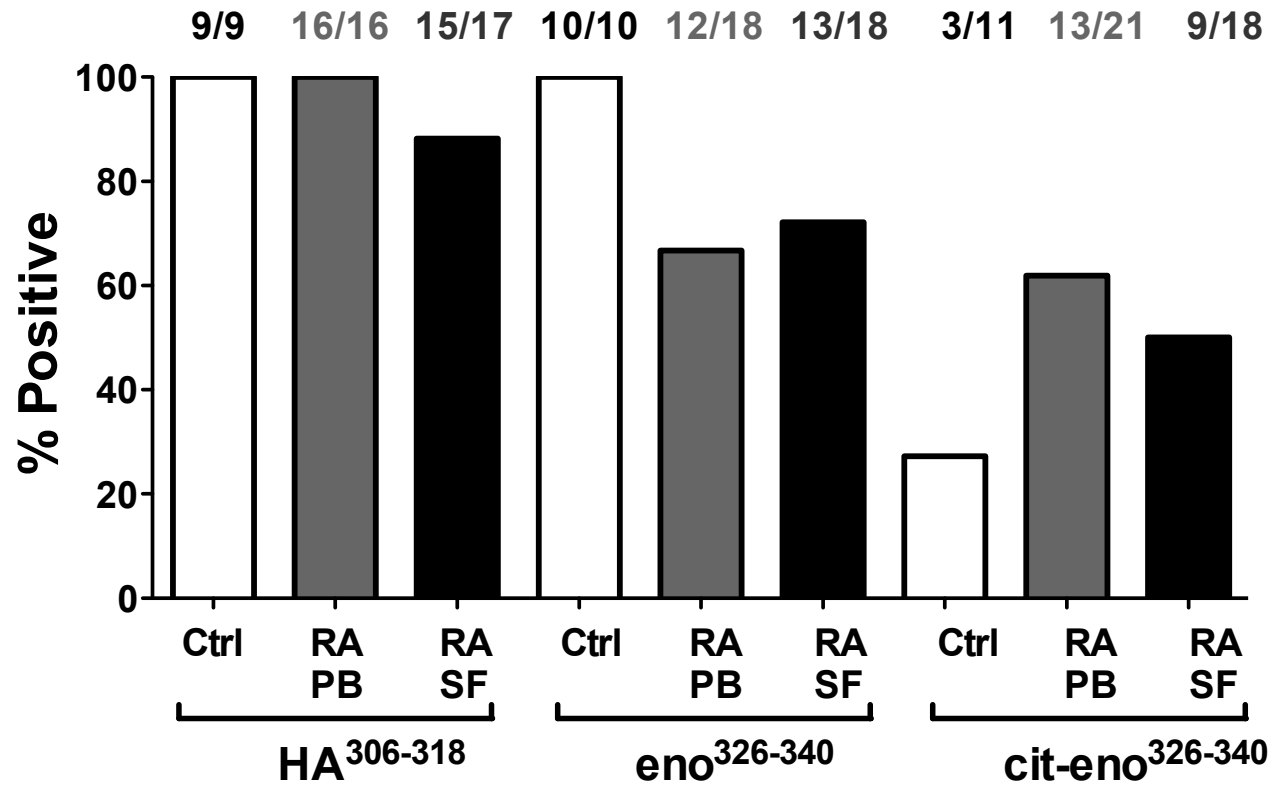

## Supplementary table 1: patient characteristics

| <b>Type</b>        | <b>Nr</b> | <b>Age at draw</b> | <b>Range</b> | <b>CCP2+ (%)</b> | <b>Female (%)</b> |
|--------------------|-----------|--------------------|--------------|------------------|-------------------|
| <b>Controls</b>    | 15        | 44                 | 22- 82       | 0                | 8 (53%)           |
| <b>RA patients</b> | 39        | 51                 | 22- 78       | 33 (84%)         | 28 (71%)          |

## Supplementary table 2

Supplementary Table 1: FACS panels. (Biol=Biolegend)

| Panel                      | Machine                                                | FITC                                                    | PE            | PerCP<br>Cy5.5 | Pe<br>Cy7       | APC                                                 | Alexa<br>Fluor 647 | eFluor650 NC            | Alexa<br>700   | APC<br>Cy7/H7    | BV421/<br>Pacific<br>Blue | V500        |
|----------------------------|--------------------------------------------------------|---------------------------------------------------------|---------------|----------------|-----------------|-----------------------------------------------------|--------------------|-------------------------|----------------|------------------|---------------------------|-------------|
| <b>In vitro<br/>BRI</b>    | BD Calibur                                             | CD25 (BD)                                               | Tmr           | CD4<br>(Biol)  |                 | Annexin V<br>(BD)<br><br>CD14 (BD)<br><br>CD19 (BD) |                    |                         |                |                  |                           |             |
| <b>In vitro<br/>KI</b>     | Gallios<br>(Beckman<br>Coulter)<br><br>Or BD<br>Influx | Annexin V<br>(BD)<br><br>CD14 (BD)<br><br>CD19 (BD)     | Tmr           | CD25<br>(Biol) |                 | (Tmr)                                               |                    |                         |                |                  |                           | CD4<br>(BD) |
| <b>Ex<br/>vivo<br/>BRI</b> | LSR II<br><br>(BD)                                     | Annexin V<br>(BD)<br><br>CD14 (Biol)<br><br>CD19 (Biol) | Tmr           | CCR6<br>(BD)   | CD28<br>(Biol)  | CD25<br>(BD)                                        |                    | CD45RO<br>(eBioscience) | CCR7<br>(BD)   |                  | CXCR3<br>(Biol)           | CD4<br>(BD) |
| <b>Ex<br/>vivo KI</b>      | Gallios                                                | Annexin V<br>(BD)<br><br>CD14 (BD)<br><br>CD19 (BD)     | Tmr           | CD25<br>(Biol) | CD62L<br>(Biol) | (Tmr)                                               |                    |                         | CD28<br>(Biol) | CD45RO<br>(Biol) |                           | CD4<br>(BD) |
| <b>ICS KI</b>              | Cyan                                                   | CD14 (BD)                                               | CD40L<br>(BD) | TNF<br>(Biol)  | IFNg<br>(Biol)  |                                                     | IL-17A<br>(Biol)   |                         |                | CD4 (BD)         | CD3<br>(Biol)             |             |
